# Supplementary material
Source: PubMed Central journal article supplement (PMC6176173)
Supplement: ajcr0008-1812-f6.pdf [file ajcr0008-1812-f6.pdf]

Molecular targeting of EHMT2 in pancreatic ductal adenocarcinoma

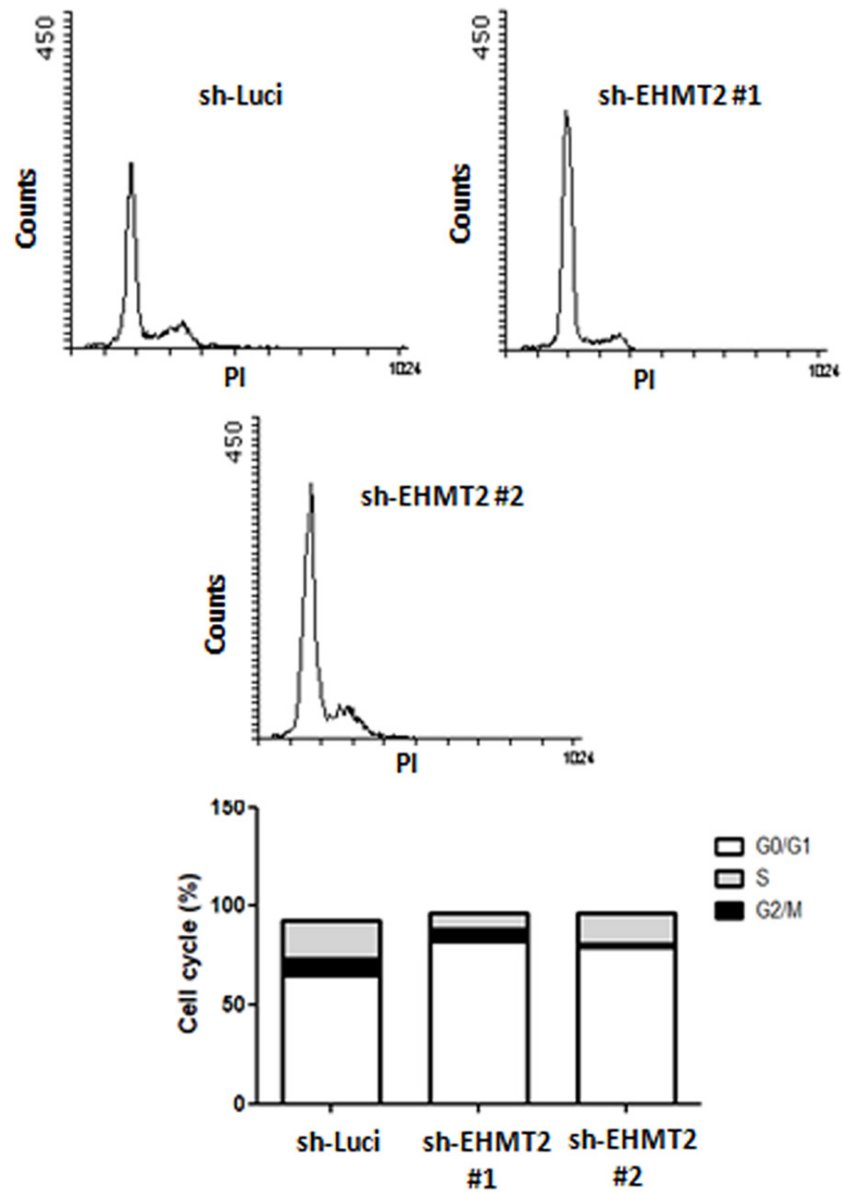

**Figure S1.** Expression profiles of cell cycle in Mia PaCa-2 and Mia PaCa-2 EHMT2 deficient (sh-EHMT2) cell lines were performed by flow cytometry.

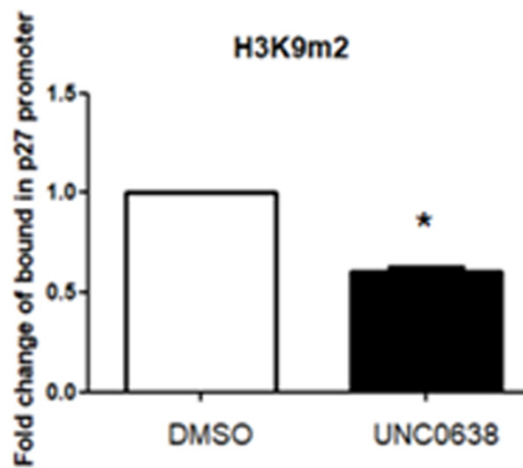

## Molecular targeting of EHMT2 in pancreatic ductal adenocarcinoma

**Figure S2.** ChIP-qPCR analysis was performed to determine the status of H3K9m2 in the p27 gene promoter in Mia PaCa-2 cells treated with UNC0638.

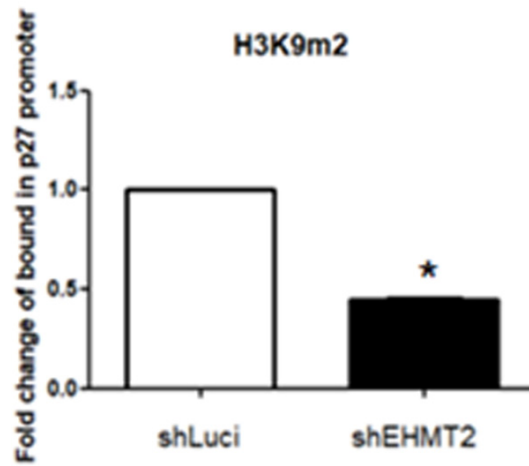

**Figure S3.** ChIP-qPCR analysis was used to determine the status of H3K9m2 in the p27 gene promoter in Mia PaCa-2 or EHMT2 knockdown cells.

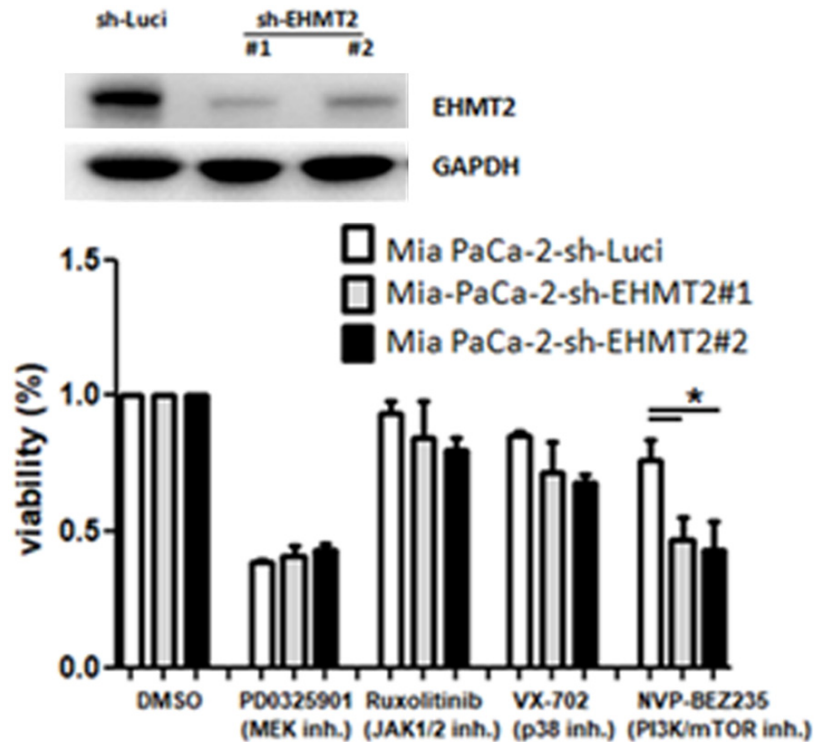

**Figure S4.** Parental Mia PaCa-2 cells (sh-Luci) and EHMT2-depleted cells (sh-EHMT2 #1 and sh-EHMT2 #2) were treated with different compounds for 72 h. Cell viability was determined by MTT assay (\* $P < 0.05$ ). Protein levels of EHMT2 were detected by western blot analysis.

Molecular targeting of EHMT2 in pancreatic ductal adenocarcinoma

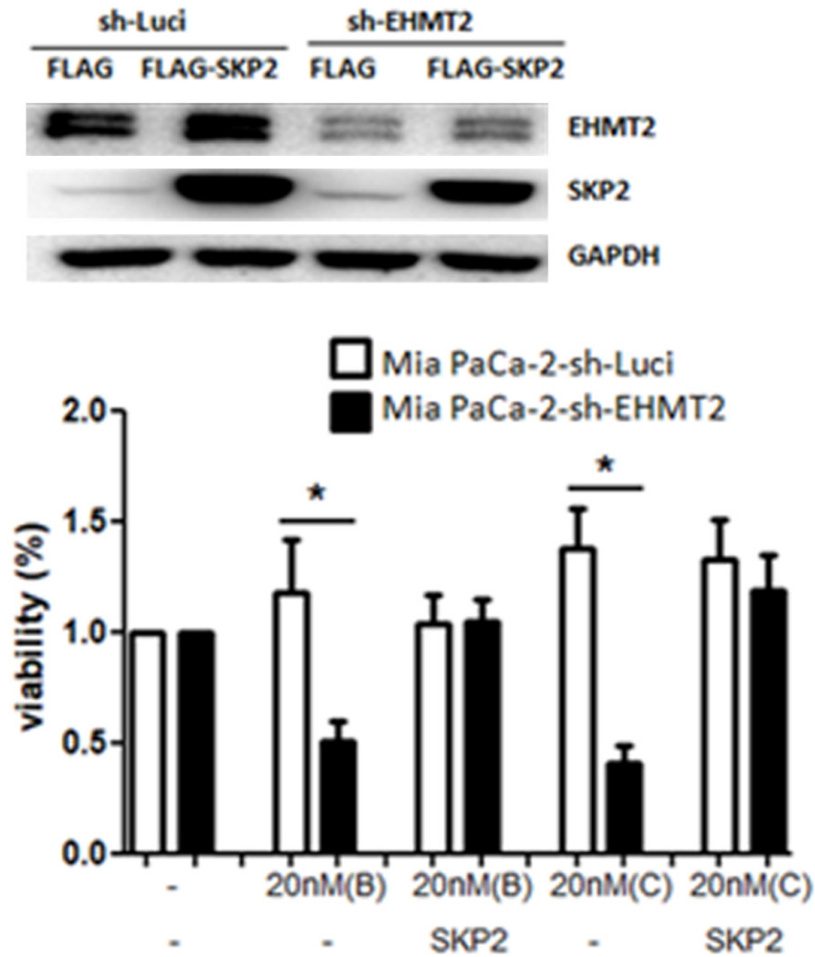

**Figure S5.** Parental Mia PaCa-2 (sh-Luci) and EHMT2-deficient (sh-EHMT2) cells were transfected with FLAG or FLAG-SKP2 plasmids and treated with dual PI3K/mTOR inhibitor (NVP-BEZ235, B and Cay10626, C) for 72 h. Cell viability was determined by MTT assay. The protein level of EHMT2 was detected by western blot analysis. Statistical comparisons were evaluated by a one-way ANOVA (\* $P < 0.05$ ).
